# Supplementary material for: Retracted Article: Overexpression of circ_0034642 contributes to hypoxia-induced glycolysis, cell proliferation, migration and invasion in gliomas by facilitating TAGLN2 expression via sponging miR-625-5p
Source: Royal Society of Chemistry journal article supplement (doi:10.1039/c9ra08600e), 2020-01-01
Supplement: c9ra08600e1.pdf [file c9ra08600e1.pdf]

## Supplementary material

### Drug-likeness of linear pentamidine analogues and their impact on hERG K<sup>+</sup> channel – correlation with structural features

Teresa Żółek<sup>a\*</sup>, Muge Qile<sup>b</sup>, Paweł Kaźmierczak<sup>a</sup>, Meye Bloothoof<sup>b</sup>, Marcel A. G. van der Heyden<sup>b</sup> and Dorota Maciejewska<sup>a\*</sup>

**Table S1** Probability of metabolism by human uridine 5'-diphosphate-glucuronosyltransferases (UGT) for **1 – 9**.

**Table S2** Values of CDOCKER interaction energy for pentamidine derivatives (**4, 5** and **6**).

**Figure S1.** Predicted intermolecular interactions by CDOCKER for compounds **4, 5** and **6**.

**Table S1**

| Compound | UGT |     |     |     |     |     |      |     |      |
|----------|-----|-----|-----|-----|-----|-----|------|-----|------|
|          | 1A1 | 1A3 | 1A4 | 1A6 | 1A8 | 1A9 | 1A10 | 2B7 | 2B15 |
| <b>1</b> | Yes | No  | Yes | No  | No  | Yes | No   | Yes | No   |
| <b>2</b> | Yes | Yes | Yes | No  | No  | Yes | No   | Yes | No   |
| <b>3</b> | Yes | Yes | Yes | No  | No  | No  | No   | Yes | No   |
| <b>4</b> | Yes | Yes | Yes | No  | No  | Yes | No   | Yes | No   |
| <b>5</b> | Yes | Yes | Yes | No  | No  | No  | No   | Yes | No   |
| <b>6</b> | Yes | Yes | Yes | No  | No  | No  | No   | No  | No   |
| <b>7</b> | No  | No  | No  | No  | No  | Yes | No   | Yes | No   |
| <b>8</b> | No  | No  | No  | No  | Yes | No  | No   | No  | No   |
| <b>9</b> | No  | No  | No  | No  | No  | Yes | No   | No  | No   |

**Table S2**

| Pose<br>number | CDOCKER interaction energy<br>(kcal/mol) |          |          |
|----------------|------------------------------------------|----------|----------|
|                | <b>4</b>                                 | <b>5</b> | <b>6</b> |
| 1              | -48,9474                                 | -59,0164 | -55,1398 |
| 2              | -49,6748                                 | -52,6177 | -56,6219 |
| 3              | -43,7155                                 | -55,7457 | -53,9279 |
| 4              | -46,4077                                 | -57,0773 | -54,1317 |
| 5              | -41,6959                                 | -52,8375 | -49,0274 |
| 6              | -44,5029                                 | -52,7724 | -55,2444 |
| 7              | -42,2372                                 | -47,7179 | -49,6112 |
| 8              | -42,2035                                 | -52,9497 | -48,2851 |
| 9              | -41,7638                                 | -48,8009 | -50,2068 |
| 10             | -42,6056                                 | -52,007  | -45,8554 |

4

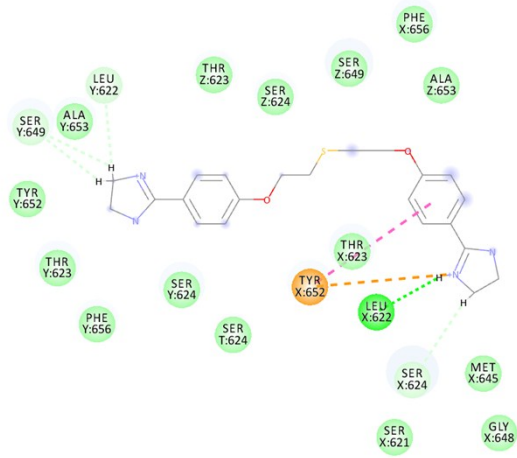

5

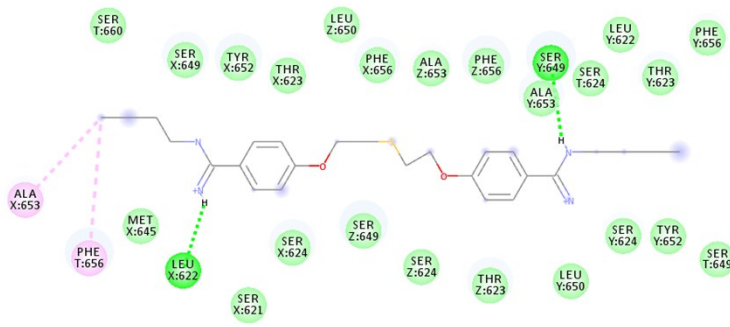

6

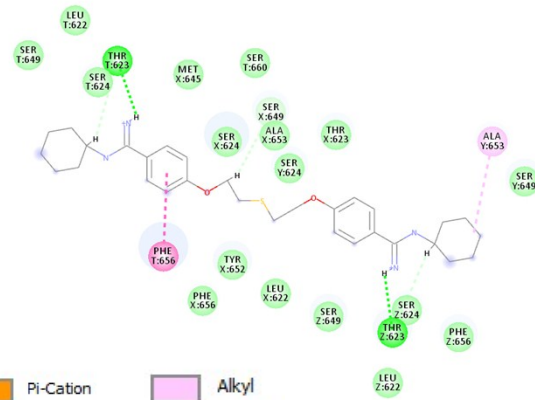

#### Interactions

|                                                                                                                |                                                                                                   |                                                                                              |
|----------------------------------------------------------------------------------------------------------------|---------------------------------------------------------------------------------------------------|----------------------------------------------------------------------------------------------|
|  van der Waals              |  Pi-Cation     |  Alkyl    |
|  Conventional Hydrogen Bond |  Pi-Pi Stacked |  Pi-Alkyl |
|  Carbon Hydrogen Bond       |                                                                                                   |                                                                                              |

Fig. S1.
